# Supplementary material for: Muscle-specific deletion of BDK amplifies loss of myofibrillar protein during protein undernutrition
Source: PubMed Central journal article supplement (PMC5209746; doi:10.1038/srep39825), 2017-01-04
Supplement: srep39825-s1.pdf [file srep39825-s1.pdf]

1 **Supplementary Information**

2

3 Muscle-specific deletion of BDK amplifies loss of myofibrillar protein during protein undernutrition

4

5 Takuya Ishikawa, Yasuyuki Kitaura, Yoshihiro Kadota, Yukako Morishita, Miki Ota, Fumiya

6 Yamanaka, Minjun Xu, Masato Ikawa, Naokazu Inoue, Fuminori Kawano, Naoya Nakai, Taro

7 Murakami, Shinji Miura, Yukino Hatazawa, Yasutomi Kamei, Yoshiharu Shimomura

8

[A]

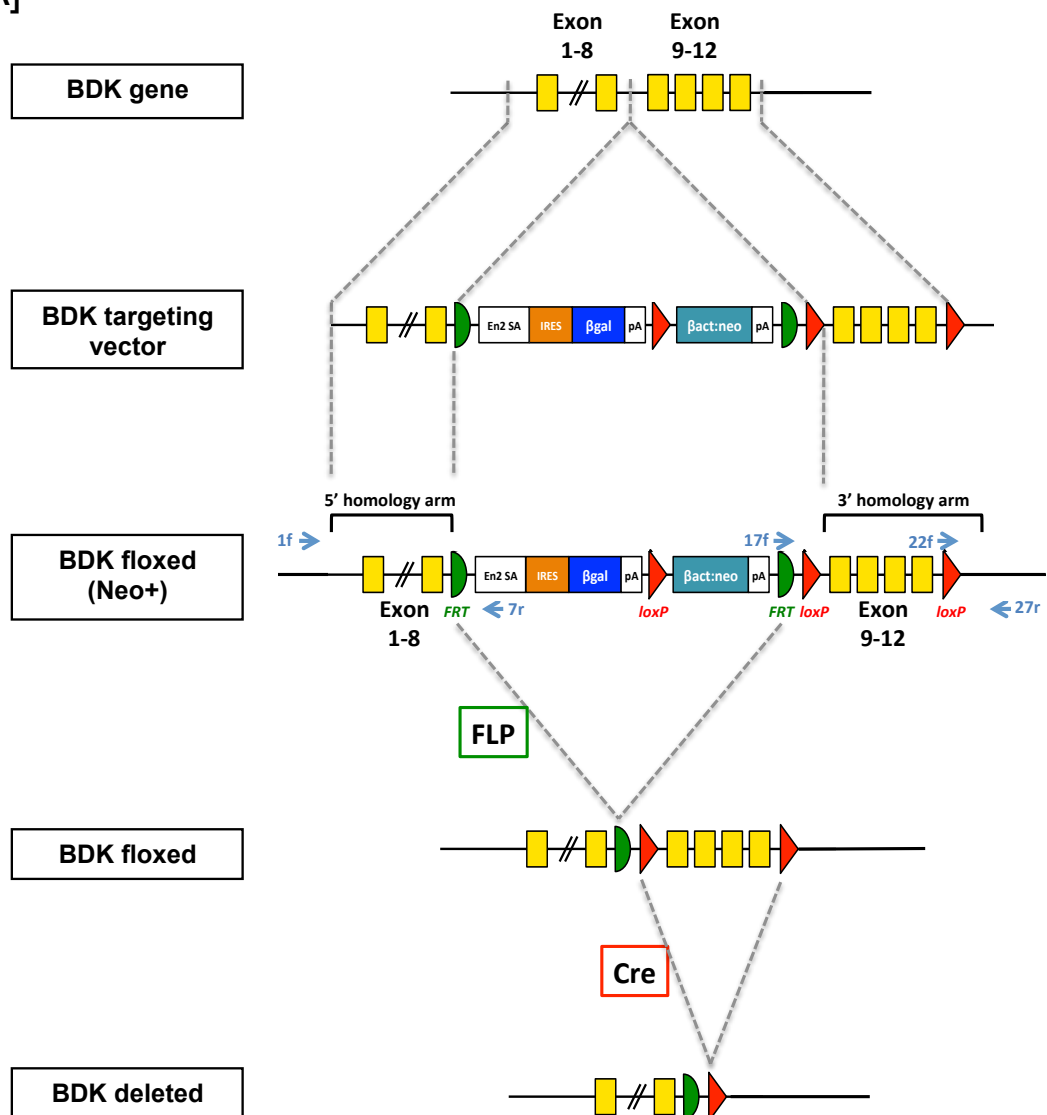

[B]

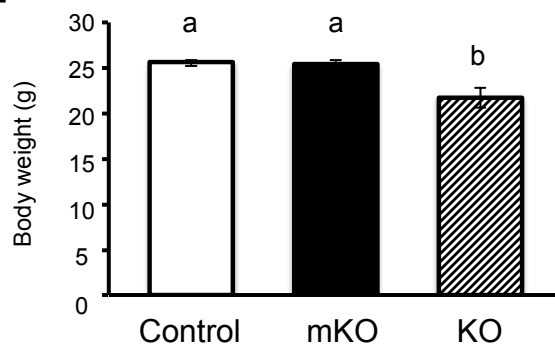

9

10

11 **Supplemental Figure S1. Generating BDK targeted mice**

12 [A] The targeting vector for the *BDK* allele. Schematic of the targeting vector for *BDK* allele with a  
13 *FRT*-flanked  $\beta$ gal/neo cassette integrated upstream of exon 9 and the floxed exons 9-12. En2SA,  
14 splicing acceptor site; IRES, internal ribosomal entry site;  $\beta$ gal,  $\beta$ -galactosidase;  $\beta$ act:neo,  
15  $\beta$ -actin-promotor followed by neomycin-resistant gene; pA, poly A sequence. The arrows show  
16 primers for PCR for genotyping. [B] Body weight of control, BDK-mKO and BDK-KO mice fed  
17 CE-2 (25% protein) at 10 weeks. Values are presented as mean  $\pm$  SE (n=8-12). Means without  
18 common letters are significantly different ( $P < 0.05$  by the Tukey-Kramer test).

19

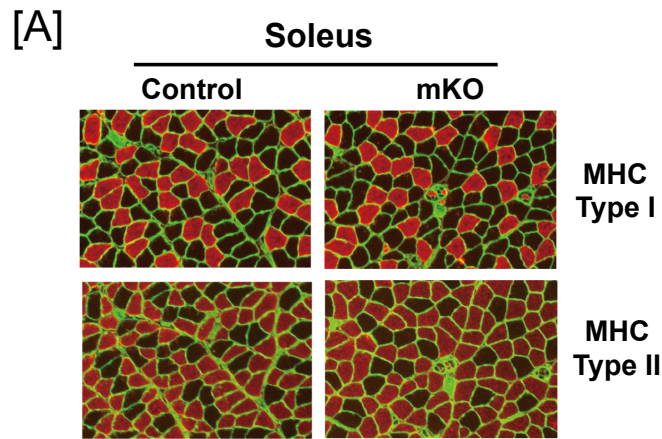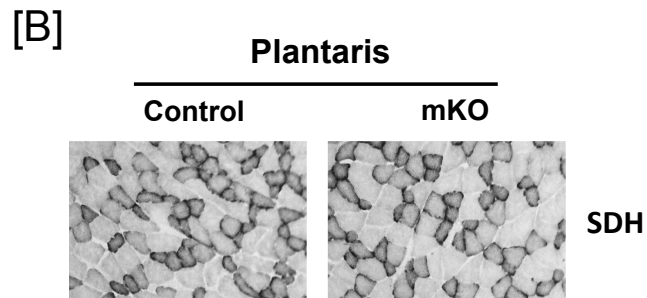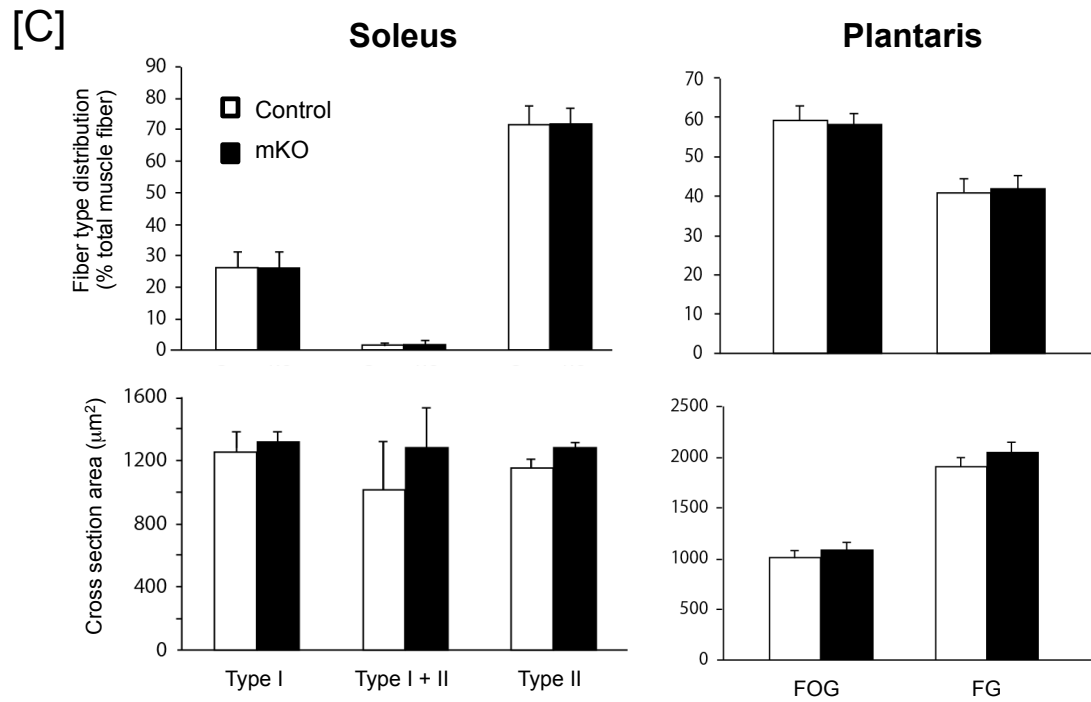

20

21

22

23 **Supplemental Figure S2. Muscle fiber characteristics of control and BDK-mKO mice.**

24 [A] Tissue cross-sections immunohistochemically stained with type I or II myosin heavy chain  
25 (MHC) (red) and laminin (green) to outline myofibers of soleus muscle from control and BDK-mKO  
26 mice fed CE-2 (25% protein). [B] Tissue cross-sections stained for succinate dehydrogenase (SDH)  
27 activity (dark gray/black) of plantaris muscle from control and BDK-mKO mice fed CE-2. [C] Fiber  
28 type distribution and cross-sectional area of Type I, I+II or II fibers of soleus muscle in [A], and fast  
29 twitch oxidative glycolytic (FOG) or fast twitch glycolytic (FG) fibers of plantaris muscle in [B].  
30 Values are presented as mean  $\pm$  SE (n=3).

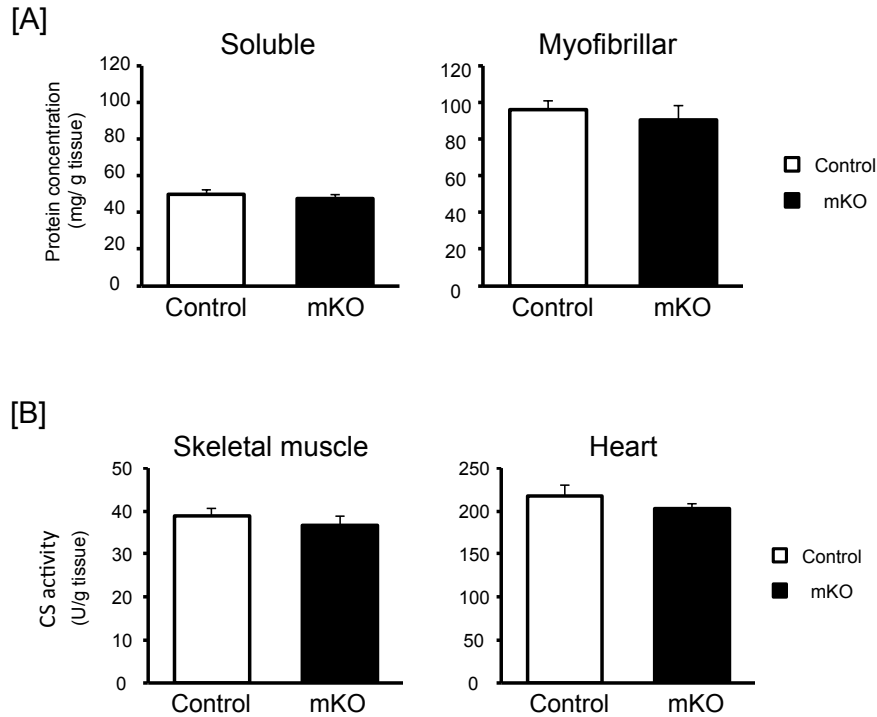

31

32

33 **Supplemental Figure S3. Skeletal muscle protein concentrations and mitochondria enzyme**  
 34 **activities in control and BDK-mKO mice.**

35 **[A]** The soluble and myofibrillar protein concentrations in skeletal muscle of 8h-fasted 10-week-old  
 36 control and BDK-mKO mice fed CE-2 (25% protein). The protein concentrations are expressed as  
 37 mg/g of tissue weight for skeletal muscle (gastrocnemius and plantaris muscle). **[B]** The activity of  
 38 citrate synthase of skeletal muscle and heart in 10-week-old control and BDK-mKO mice fed CE-2.  
 39 Values are presented as mean  $\pm$  SE (n=10-12).

40

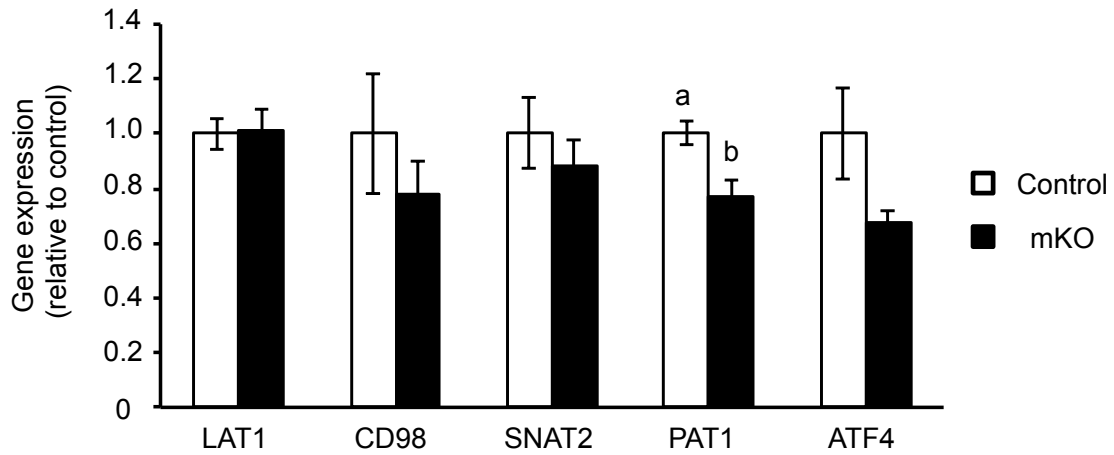

41

42

43 **Supplemental Figure S4. The expression of mRNA encoding amino acid transporters in**  
 44 **skeletal muscle from control and BDK-mKO mice.**

45 The gene expression of system L amino acid transporters (LAT1 and CD98), system A amino acid  
 46 transporter (SNAT2), proton-assisted amino acid transporter (PAT1) and ATF4 in skeletal muscle of  
 47 8h-fasted BDK-mKO mice fed CE-2 (25% protein) are expressed relative to those from control mice.

48 Values are presented as mean ± SE (n=4). Means without common letters are significantly different  
 49 (P<0.05 by Student's t test).

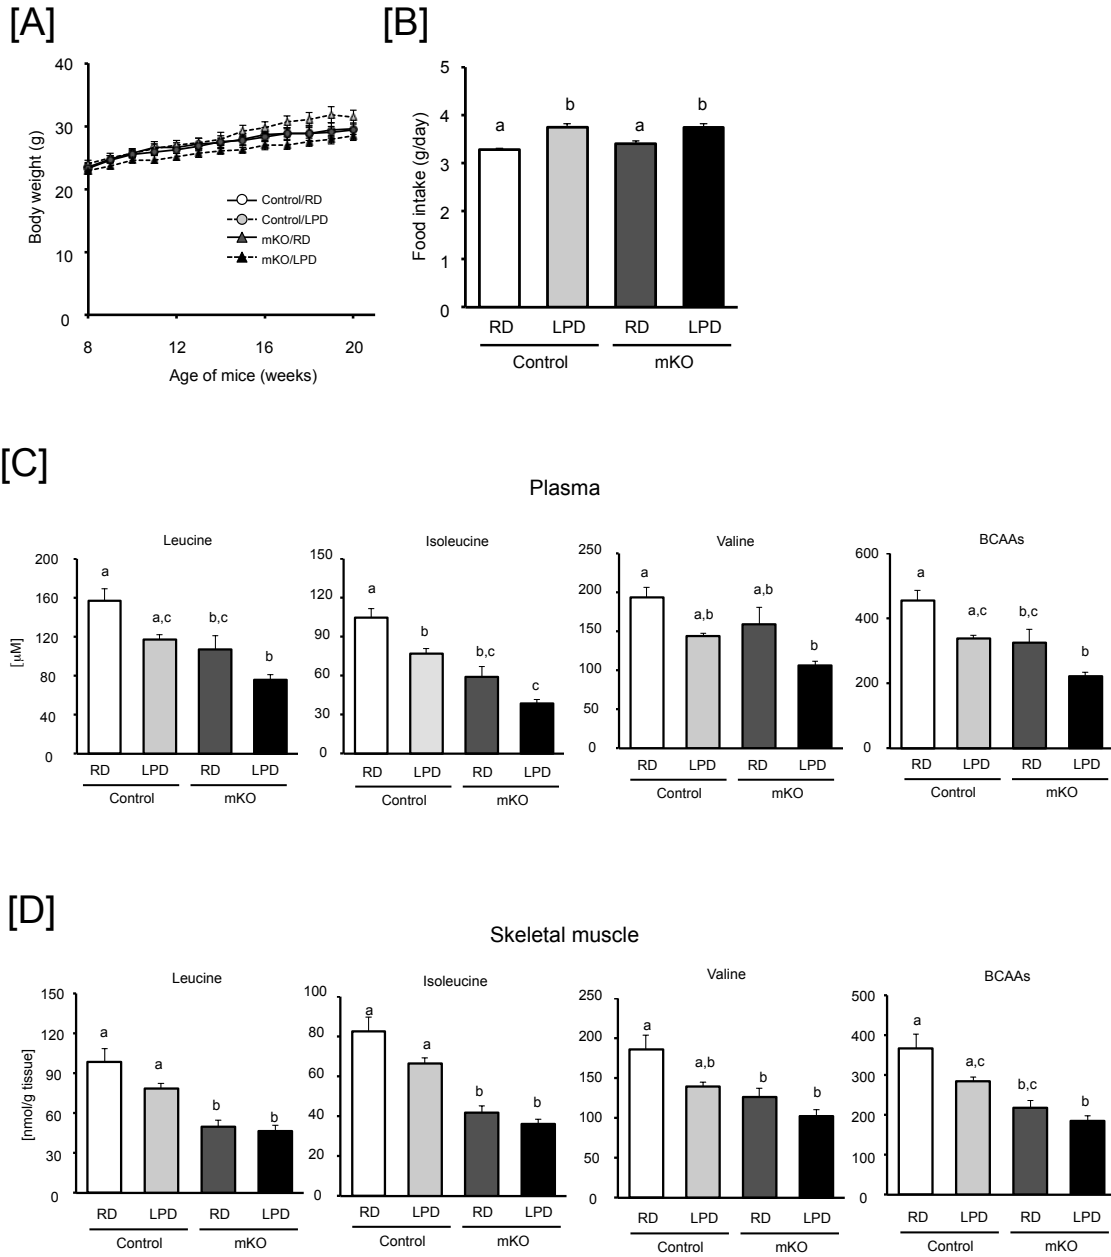

50

51

52 **Supplemental Figure S5. Growth curves, food intake and BCAA concentrations of control and**  
 53 **BDK-mKO mice fed RD or LPD for 12 weeks.**

54 Growth curves [A], food intake [B], concentrations of leucine, isoleucine, valine and BCAAs (2h  
 55 fasted) in plasma [C] and skeletal muscle [D] of control and mKO mice fed regular protein diet (RD,  
 56 20% protein) and low protein diet (LPD, 8% protein). Values are presented as mean ± SE (n=4-7).  
 57 Means without common letters are significantly different (P<0.05 by the Tukey-Kramer test).

58



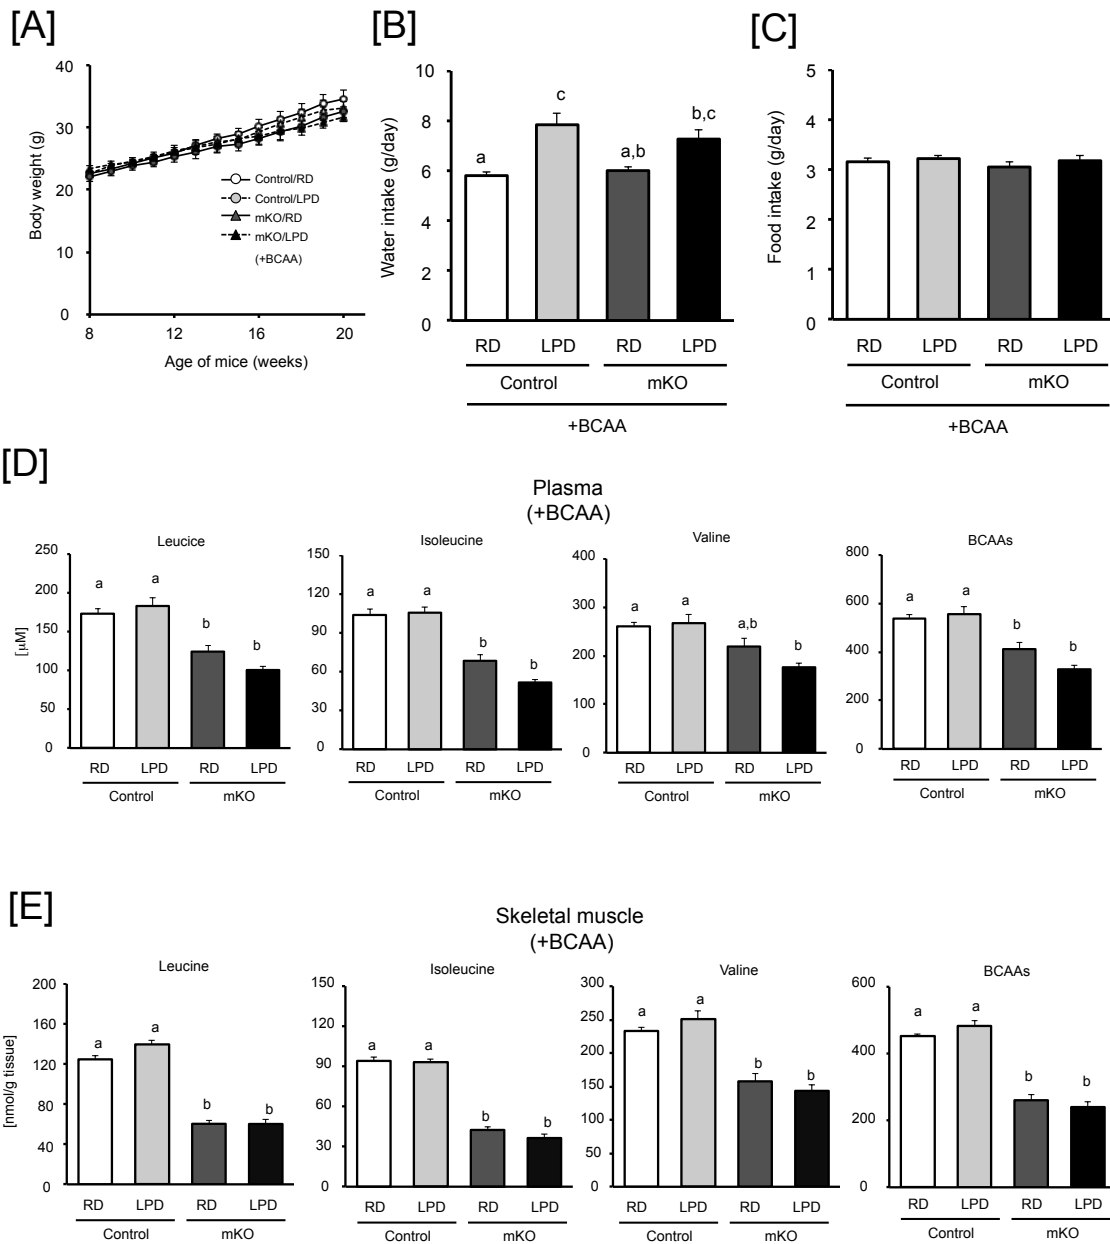

59

60

61 **Supplemental Figure S6. Growth curves, food and water intake of control and mKO mice fed**  
 62 **RD or LPD for 12 weeks with BCAA supplemented water.**

63 Growth curves [A], water intake [B], food intake [C] and concentrations of leucine, isoleucine,  
 64 valine and BCAAs (2h-fasted) in plasma [D] and skeletal muscle [E] of control and mKO mice fed  
 65 RD (20% protein) or LPD (8% protein) with BCAA supplemented water. Values are presented as  
 66 mean ± SE (n=5-8). Means without common letters are significantly different (P<0.05 by the  
 67 Tukey-Kramer test).

68

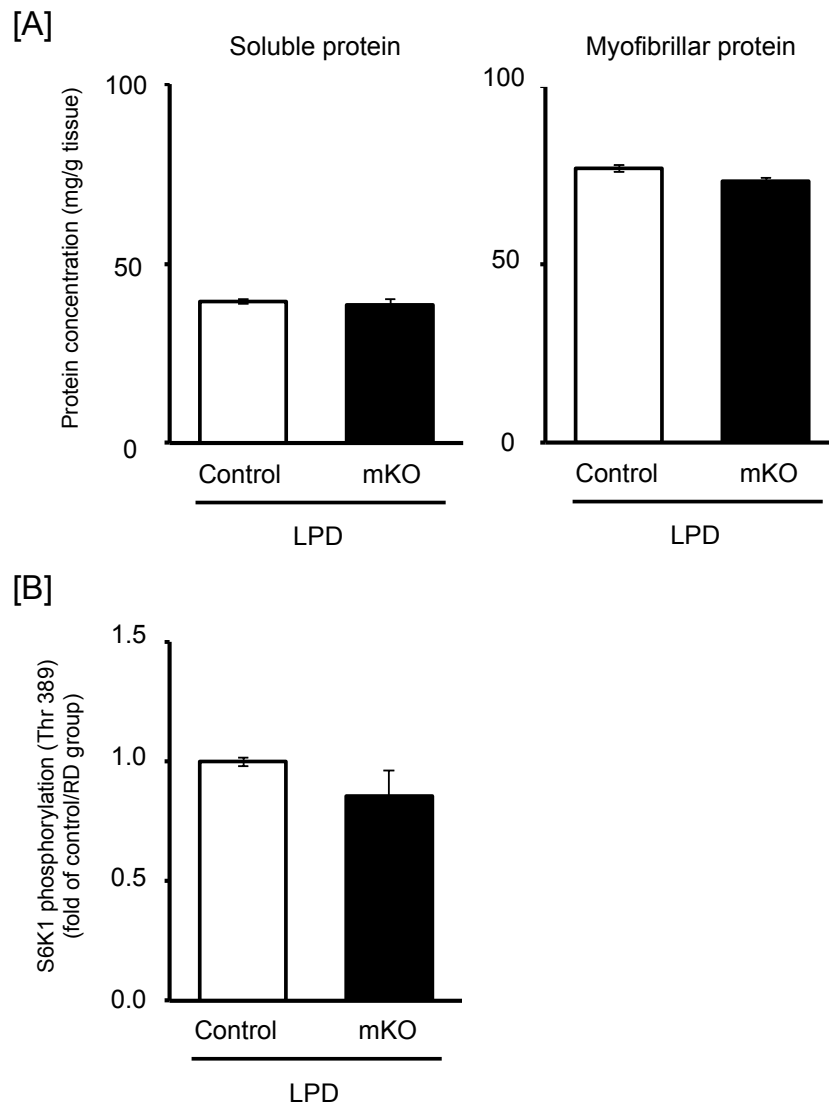

69

70 **Supplemental Figure S7. Skeletal muscle protein concentrations and mTORC1 activity in**  
 71 **control and BDK-mKO mice fed RD or LPD for 4 weeks.**

72 **[A]** Soluble and myofibrillar protein concentrations in skeletal muscle of 2 h-fasted control and  
 73 BDK-mKO mice fed RD (20% protein) or LPD (8% protein) for 4 weeks. The protein  
 74 concentrations are expressed as mg/g of tissue weight for skeletal muscle (gastrocnemius and  
 75 plantaris muscle). **[B]** The activity of mTORC1 in skeletal muscle of 2 h-fasted control and  
 76 BDK-mKO mice fed RD or LPD for 4 weeks. The phosphorylated levels of S6K1 and 4E-BP1 are  
 77 expressed as in Fig. 2. The data are presented relative to the mean values of the control/RD group.  
 78 Typical images of western blots are shown above each bar. Values are presented as mean  $\pm$  SE  
 79 (n=4-7).

80

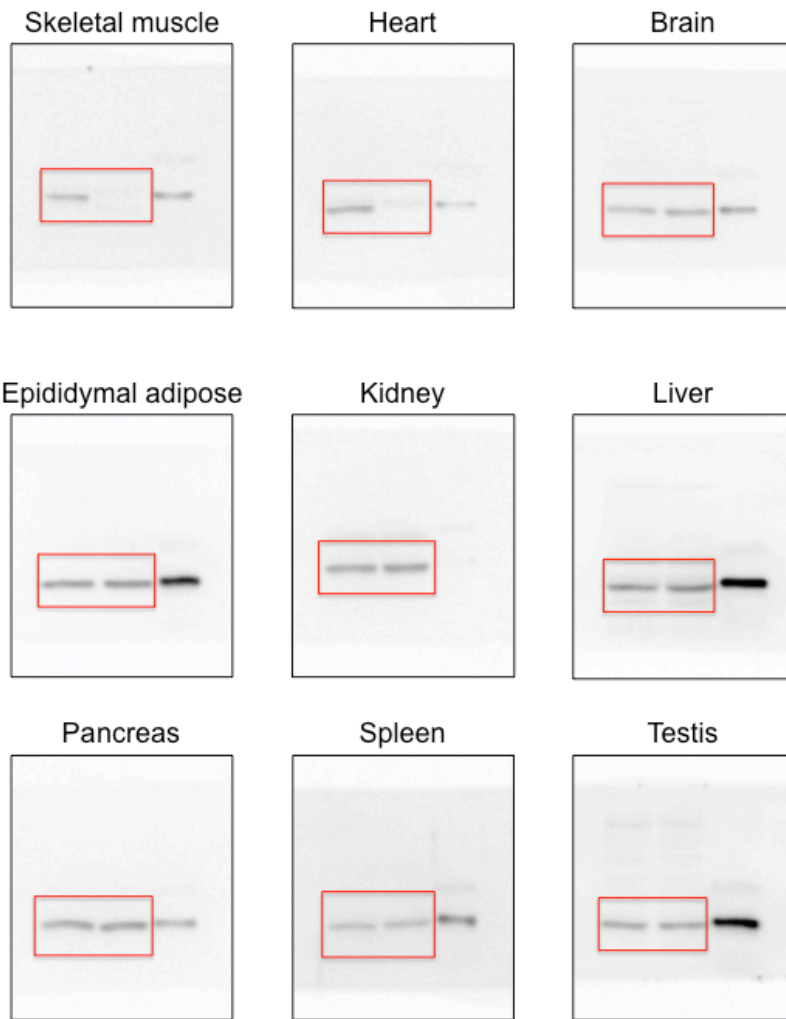

81

82

83 **Supplementary Figure S8. Full-length gels/blots of Figure 1 [A].**

84

P-S6K1

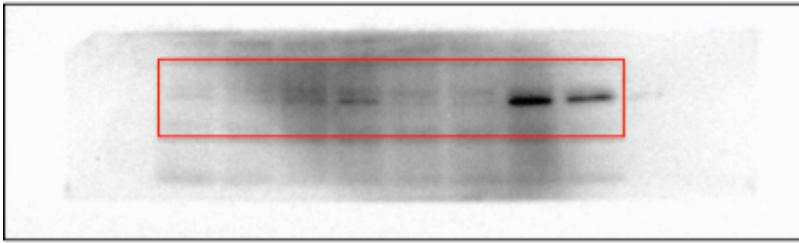

S6K1

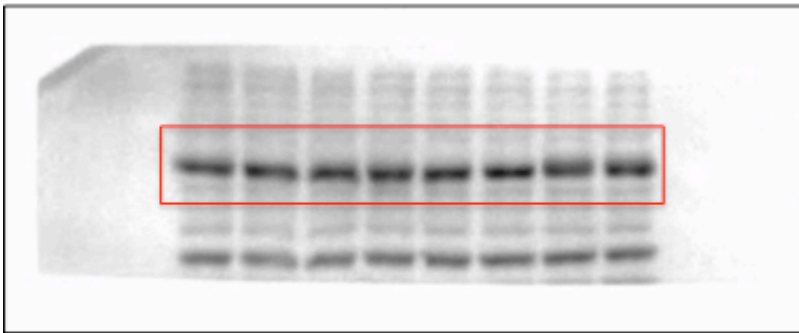

4E-BP1

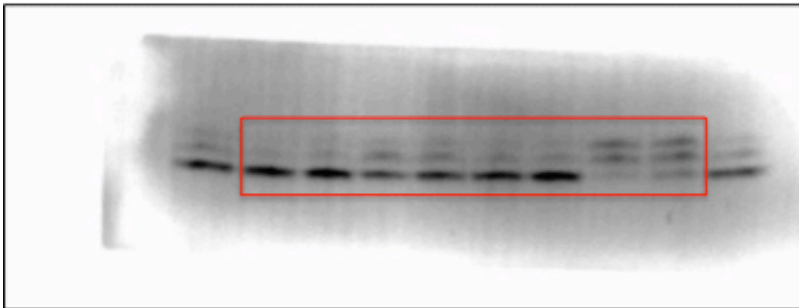

85

86

87 **Supplementary Figure S9. Full-length gels/blots of Figure 2.**

88

P-S6K1

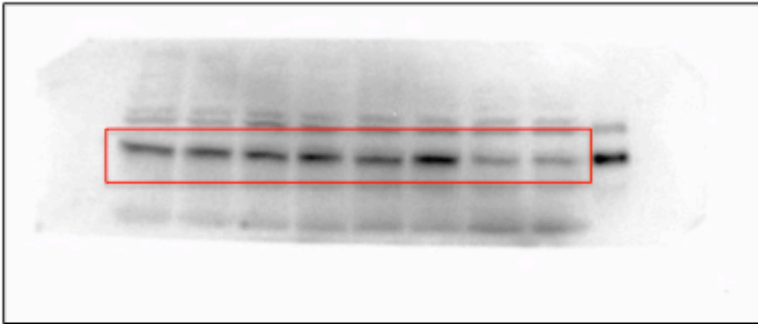

S6K1

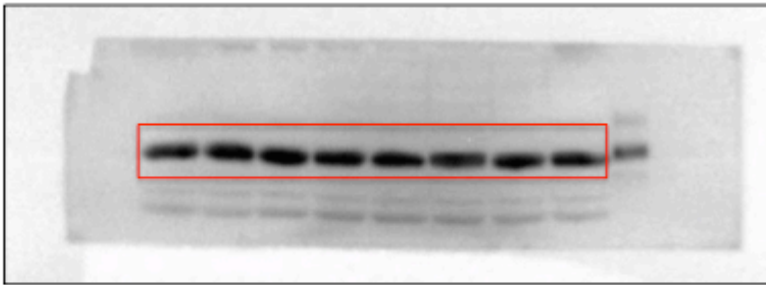

4E-BP1

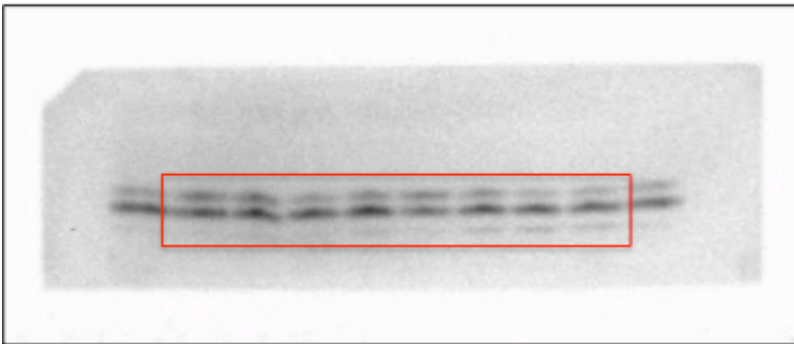

89

90

91 **Supplementary Figure S10. Full-length gels/blots of Figure 3[A] and [B].**

92

LC3

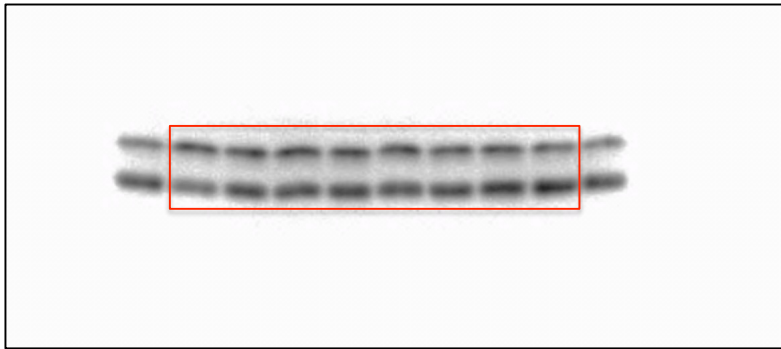

P-eIF2 $\alpha$

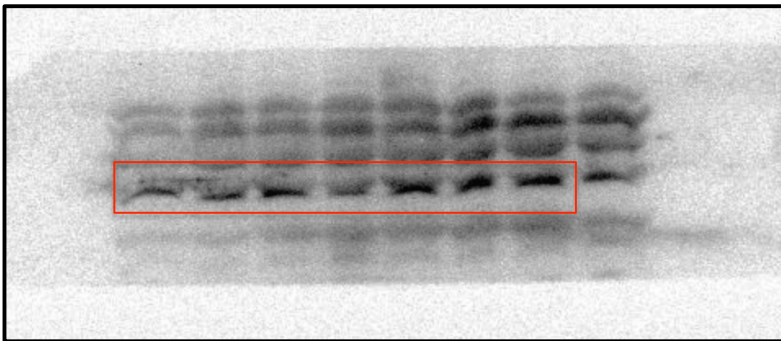

eIF2 $\alpha$

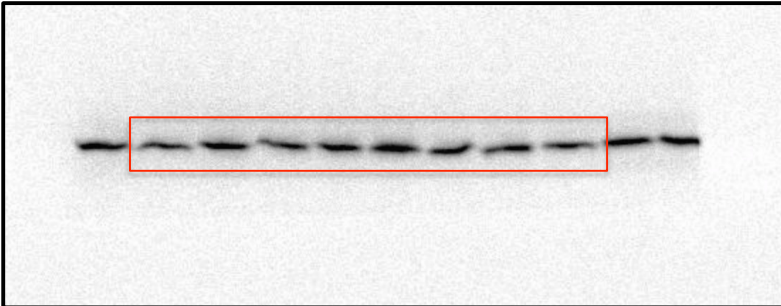

93

94

95 **Supplementary Figure S11. Full-length gels/blots of Figure 3[C] and [D].**

96

P-S6K1

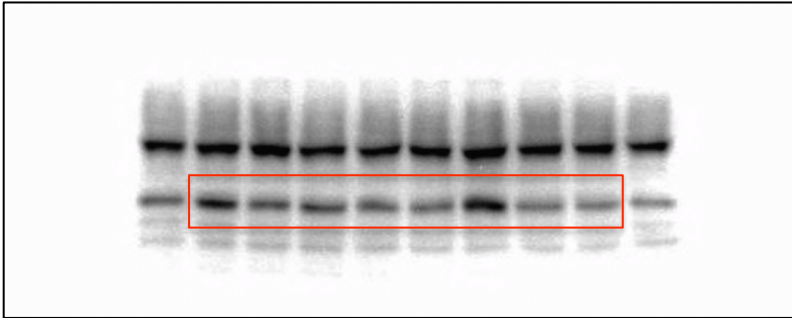

S6K1

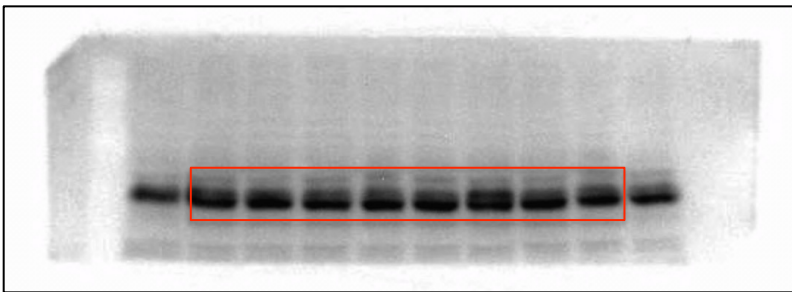

4E-BP1

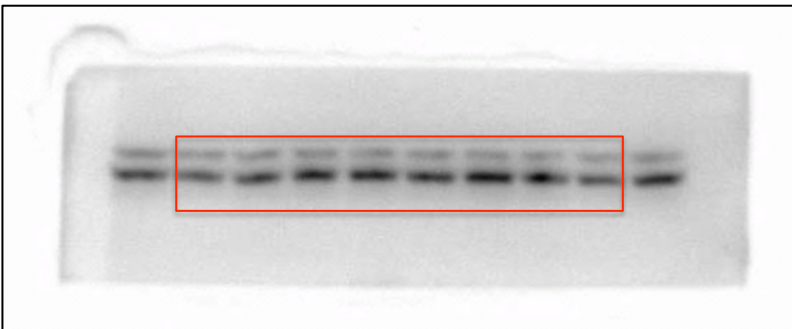

97

98

99 **Supplementary Figure S12. Full-length gels/blots of Figure 4.**

100

101 **Supplemental Table S1. List of genes up- or down-regulated in BDK-mKO mice by**  
 102 **microarray.** Listed genes were up-regulated more than 2-fold or down-regulated less than half in  
 103 extensor digitorum longus (EDL) and soleus from BDK-mKO mice compared to control mice fed  
 104 CE-2 (25% protein) at freely-fed state.  
 105

**EDL**

| GeneSymbol    | Description                                                                         | mKO/Control |
|---------------|-------------------------------------------------------------------------------------|-------------|
| 3300002I08Rik | Mus musculus RIKEN cDNA 3300002I08 gene (3300002I08Rik), mRNA [NM_027017]           | 8.77        |
| Acyp2         | Mus musculus acylphosphatase 2, muscle type (Acyp2), mRNA [NM_029344]               | 2.24        |
| Angptl4       | Mus musculus angiopoietin-like 4 (Angptl4), mRNA [NM_020581]                        | 0.39        |
| Egr1          | Mus musculus early growth response 1 (Egr1), mRNA [NM_007913]                       | 0.33        |
| Zfp36l3       | Mus musculus zinc finger protein 36, C3H type-like 3 (Zfp36l3), mRNA [NM_001009549] | 0.29        |
| Hat1          | Mus musculus histone aminotransferase 1 (Hat1), mRNA [NM_026115]                    | 0.22        |
| Bckdk         | Mus musculus branched chain ketoacid dehydrogenase kinase (Bckdk), mRNA [NM_009739] | 0.03        |

**Soleus**

| GeneSymbol    | Description                                                                         | mKO/Control |
|---------------|-------------------------------------------------------------------------------------|-------------|
| 3300002I08Rik | Mus musculus RIKEN cDNA 3300002I08 gene (3300002I08Rik), mRNA [NM_027017]           | 3.75        |
| Angptl4       | Mus musculus angiopoietin-like 4 (Angptl4), mRNA [NM_020581]                        | 0.40        |
| Egr1          | Mus musculus early growth response 1 (Egr1), mRNA [NM_007913]                       | 0.35        |
| Bckdk         | Mus musculus branched chain ketoacid dehydrogenase kinase (Bckdk), mRNA [NM_009739] | 0.07        |

106

107



108 **Supplemental Table S2. The concentrations of leucine, isoleucine, valine and total BCAAs in**  
 109 **the plasma and skeletal muscle of control and BDK-mKO mice fed RD (20% protein) at 1 h**  
 110 **after bolus ingestion of water or BCAAs.**

111 The concentrations are expressed as  $\mu\text{M}$  for plasma or  $\text{nmol/g}$  tissue for skeletal muscle. Values are  
 112 presented as mean  $\pm$  SE (n=4-6). Means without common letters are significantly different ( $P < 0.05$   
 113 by the Tukey-Kramer test).

114

115 Plasma

|            | Control/water             | Control/BCAAs               | BDK-mKO/water             | BDK-mKO/BCAAs               |
|------------|---------------------------|-----------------------------|---------------------------|-----------------------------|
| Leucine    | 183 $\pm$ 19 <sup>a</sup> | 1433 $\pm$ 61 <sup>b</sup>  | 119 $\pm$ 8 <sup>a</sup>  | 1203 $\pm$ 74 <sup>c</sup>  |
| Isoleucine | 117 $\pm$ 11 <sup>a</sup> | 720 $\pm$ 32 <sup>b</sup>   | 64 $\pm$ 5 <sup>a</sup>   | 551 $\pm$ 31 <sup>c</sup>   |
| Valine     | 194 $\pm$ 19 <sup>a</sup> | 1674 $\pm$ 41 <sup>b</sup>  | 148 $\pm$ 10 <sup>a</sup> | 1418 $\pm$ 62 <sup>c</sup>  |
| BCAAs      | 494 $\pm$ 48 <sup>a</sup> | 3827 $\pm$ 128 <sup>b</sup> | 330 $\pm$ 23 <sup>a</sup> | 3172 $\pm$ 166 <sup>c</sup> |

116

117 Skeletal muscle

|            | Control/water             | Control/BCAAs               | BDK-mKO/water             | BDK-mKO/BCAAs              |
|------------|---------------------------|-----------------------------|---------------------------|----------------------------|
| Leucine    | 159 $\pm$ 28 <sup>a</sup> | 1122 $\pm$ 37 <sup>b</sup>  | 98 $\pm$ 6 <sup>a</sup>   | 899 $\pm$ 37 <sup>c</sup>  |
| Isoleucine | 125 $\pm$ 19 <sup>a</sup> | 589 $\pm$ 20 <sup>b</sup>   | 73 $\pm$ 4 <sup>a</sup>   | 450 $\pm$ 19 <sup>c</sup>  |
| Valine     | 183 $\pm$ 34 <sup>a</sup> | 1234 $\pm$ 59 <sup>b</sup>  | 141 $\pm$ 9 <sup>a</sup>  | 1073 $\pm$ 34 <sup>b</sup> |
| BCAAs      | 467 $\pm$ 81 <sup>a</sup> | 2944 $\pm$ 116 <sup>b</sup> | 312 $\pm$ 19 <sup>a</sup> | 2422 $\pm$ 90 <sup>b</sup> |

118

119 **Supplemental Table S3. Skeletal muscle weights of control and BDK-mKO mice fed RD (20%**  
 120 **protein) or LPD (8% protein) for 12 weeks.**

121 Weights of the Muscle R and Muscle L correspond to the sum of the gastrocnemius, plantaris and  
 122 soleus, and the sum of gastrocnemius and plantaris, respectively. Values are presented as mean  $\pm$  SE  
 123 (n=4-7).

124

125

|          | Relative weight [g/100 g BW] |            |             |            |            |            |             |            |
|----------|------------------------------|------------|-------------|------------|------------|------------|-------------|------------|
|          | Control/RD                   |            | Control/LPD |            | BDK-mKO/RD |            | BDK-mKO/LPD |            |
| Muscle L | 0.54                         | $\pm$ 0.03 | 0.50        | $\pm$ 0.01 | 0.55       | $\pm$ 0.01 | 0.56        | $\pm$ 0.02 |
| Muscle R | 0.58                         | $\pm$ 0.01 | 0.55        | $\pm$ 0.02 | 0.59       | $\pm$ 0.01 | 0.58        | $\pm$ 0.01 |
| Soleus   | 0.03                         | $\pm$ 0.00 | 0.03        | $\pm$ 0.00 | 0.03       | $\pm$ 0.00 | 0.03        | $\pm$ 0.00 |

126

127

128

129 **Supplemental Table S4 Skeletal muscle weights of control and BDK-mKO mice fed RD (20%**  
 130 **protein) or LPD (8% protein) for 12 weeks with BCAA supplemented water.**

131 Weights of the Muscle R and Muscle L correspond to the sum of the gastrocnemius, plantaris and  
 132 soleus, and the sum of gastrocnemius and plantaris, respectively. Values are presented as mean  $\pm$  SE  
 133 (n=5-8).

134

|          | Relative weight [g/100 g BW] |            |             |            |            |            |             |            |
|----------|------------------------------|------------|-------------|------------|------------|------------|-------------|------------|
|          | Control/RD                   |            | Control/LPD |            | BDK-mKO/RD |            | BDK-mKO/LPD |            |
| Muscle L | 0.47                         | $\pm$ 0.01 | 0.49        | $\pm$ 0.02 | 0.50       | $\pm$ 0.02 | 0.53        | $\pm$ 0.02 |
| Muscle R | 0.51                         | $\pm$ 0.01 | 0.53        | $\pm$ 0.02 | 0.53       | $\pm$ 0.02 | 0.56        | $\pm$ 0.02 |
| Soleus   | 0.03                         | $\pm$ 0.00 | 0.03        | $\pm$ 0.00 | 0.03       | $\pm$ 0.00 | 0.03        | $\pm$ 0.00 |

135

136

137

138 **Supplemental Table S5. The concentrations of amino acids other than BCAAs in the plasma**  
 139 **and skeletal muscle of 2 h-fasted control and BDK-mKO mice fed RD (20% protein) or LPD**  
 140 **(8% protein) for 12 weeks.**

141 The concentrations are expressed as  $\mu\text{M}$  for plasma or  $\text{nmol/g}$  tissue for skeletal muscle. Values are  
 142 presented as mean  $\pm$  SE (n=5-8). Means without common letters are significantly different ( $P < 0.05$ )  
 143 by the Tukey-Kramer test).

144

145 **Plasma**

|               | Control/RD                  | Control/LPD                 | BDK-mKO/RD                | BDK-mKO/LPD               |
|---------------|-----------------------------|-----------------------------|---------------------------|---------------------------|
| Alanine       | 465 $\pm$ 74                | 527 $\pm$ 46                | 521 $\pm$ 50              | 582 $\pm$ 31              |
| Arginine      | 90 $\pm$ 6                  | 102 $\pm$ 2                 | 85 $\pm$ 8                | 95 $\pm$ 5                |
| Asparagine    | 103 $\pm$ 15                | 126 $\pm$ 7                 | 107 $\pm$ 10              | 120 $\pm$ 5               |
| Aspartic acid | 21 $\pm$ 3 <sup>a,b</sup>   | 21 $\pm$ 1 <sup>a,b</sup>   | 19 $\pm$ 2 <sup>a</sup>   | 28 $\pm$ 2 <sup>b</sup>   |
| Glutamic acid | 55 $\pm$ 7                  | 44 $\pm$ 6                  | 54 $\pm$ 8                | 51 $\pm$ 5                |
| Glutamine     | 515 $\pm$ 27 <sup>a,b</sup> | 518 $\pm$ 15 <sup>a,b</sup> | 486 $\pm$ 21 <sup>a</sup> | 590 $\pm$ 16 <sup>b</sup> |
| Glycine       | 255 $\pm$ 15                | 273 $\pm$ 15                | 257 $\pm$ 15              | 241 $\pm$ 8               |
| Histidine     | 59 $\pm$ 7                  | 42 $\pm$ 2                  | 56 $\pm$ 4                | 55 $\pm$ 6                |
| Lysine        | 286 $\pm$ 24                | 257 $\pm$ 7                 | 315 $\pm$ 30              | 292 $\pm$ 9               |
| Methionine    | 84 $\pm$ 12                 | 70 $\pm$ 7                  | 81 $\pm$ 12               | 63 $\pm$ 8                |
| Phenylalanine | 74 $\pm$ 7                  | 65 $\pm$ 3                  | 71 $\pm$ 3                | 61 $\pm$ 4                |
| Serine        | 150 $\pm$ 15                | 173 $\pm$ 9                 | 149 $\pm$ 15              | 184 $\pm$ 6               |
| Threonine     | 208 $\pm$ 20                | 236 $\pm$ 13                | 213 $\pm$ 25              | 267 $\pm$ 8               |
| Tyrosine      | 120 $\pm$ 10                | 121 $\pm$ 8                 | 126 $\pm$ 9               | 124 $\pm$ 7               |

146

147

148

149 **Skeletal muscle**

|               | Control/RD                | Control/LPD             | BDK-mKO/RD              | BDK-mKO/LPD             |
|---------------|---------------------------|-------------------------|-------------------------|-------------------------|
| Alanine       | 2589 ± 232 <sup>a,c</sup> | 2382 ± 127 <sup>a</sup> | 3035 ± 126 <sup>c</sup> | 3386 ± 103 <sup>b</sup> |
| Arginine      | 240 ± 27 <sup>a</sup>     | 260 ± 15 <sup>a</sup>   | 287 ± 37 <sup>a,b</sup> | 392 ± 38 <sup>b</sup>   |
| Asparagine    | 180 ± 17                  | 191 ± 12                | 191 ± 13                | 225 ± 11                |
| Aspartic acid | 881 ± 45 <sup>a,b</sup>   | 772 ± 30 <sup>a</sup>   | 882 ± 58 <sup>a,b</sup> | 991 ± 35 <sup>b</sup>   |
| Glutamic acid | 648 ± 45 <sup>a,b</sup>   | 510 ± 51 <sup>a</sup>   | 697 ± 61 <sup>a,b</sup> | 780 ± 60 <sup>b</sup>   |
| Glutamine     | 1530 ± 116 <sup>a</sup>   | 1392 ± 88 <sup>a</sup>  | 1557 ± 97 <sup>a</sup>  | 2096 ± 73 <sup>b</sup>  |
| Glycine       | 2277 ± 188                | 2674 ± 180              | 2295 ± 128              | 2640 ± 101              |
| Histidine     | 121 ± 32 <sup>a</sup>     | 148 ± 6 <sup>a</sup>    | 173 ± 8 <sup>a</sup>    | 218 ± 8 <sup>b</sup>    |
| Lysine        | 701 ± 202                 | 814 ± 66                | 1294 ± 216              | 1451 ± 168              |
| Methionine    | 70 ± 7                    | 62 ± 3                  | 70 ± 6                  | 61 ± 2                  |
| Phenylalanine | 50 ± 8                    | 42 ± 2                  | 46 ± 4                  | 44 ± 3                  |
| Serine        | 327 ± 37 <sup>a</sup>     | 380 ± 23 <sup>a</sup>   | 349 ± 23 <sup>a</sup>   | 517 ± 27 <sup>b</sup>   |
| Threonine     | 387 ± 51 <sup>a</sup>     | 408 ± 22 <sup>a</sup>   | 429 ± 38 <sup>a</sup>   | 627 ± 35 <sup>b</sup>   |
| Tyrosine      | 99 ± 10                   | 101 ± 9                 | 115 ± 5                 | 121 ± 3                 |

150

151

## 152 Supplemental Table S6. Experimental diets

153

| Name                                  | Regular Diet (RD) |             | Low Protein Diet (LPD) |             |
|---------------------------------------|-------------------|-------------|------------------------|-------------|
| Product #                             | D12450J           |             | D06011002              |             |
|                                       | g%                | kcal%       | g%                     | kcal%       |
| Protein                               | 19                | 20          | 8                      | 8           |
| Carbohydrate                          | 67                | 70          | 79                     | 82          |
| Fat                                   | 4                 | 10          | 4                      | 10          |
| <b>Total</b>                          |                   | <b>100</b>  |                        | <b>100</b>  |
| <b>kcal/g</b>                         | <b>3.8</b>        |             | <b>3.8</b>             |             |
|                                       |                   |             |                        |             |
| Ingredient                            | g                 | kcal        | g                      | kcal        |
| Casein                                | 200               | 800         | 79.8                   | 319         |
| L-Cystine                             | 3                 | 12          | 1.2                    | 5           |
| Corn Starch                           | 506.2             | 2025        | 628.2                  | 2513        |
| Maltodextrin                          | 125               | 500         | 125                    | 500         |
| Sucrose                               | 68.8              | 275         | 68.8                   | 275         |
| Cellulose, BW200                      | 50                | 0           | 50                     | 0           |
| Soybean Oil                           | 25                | 225         | 25                     | 225         |
| Lard                                  | 20                | 180         | 20                     | 180         |
| Mineral Mix S10026                    | 10                | 0           | 10                     | 0           |
| DiCalcium Phosphate                   | 13                | 0           | 13                     | 0           |
| Calcium Carbonate                     | 5.5               | 0           | 5.5                    | 0           |
| Potassium Citrate, 1 H <sub>2</sub> O | 16.5              | 0           | 16.5                   | 0           |
| Vitamin Mix V10001                    | 10                | 40          | 10                     | 40          |
| Choline Bitartrate                    | 2                 | 0           | 2                      | 0           |
| <b>Total</b>                          | <b>1055</b>       | <b>4057</b> | <b>1055</b>            | <b>4057</b> |

154
